# Supplementary material
Source: publisher figshare collection journal article supplement (https://acs.figshare.com/ndownloader/files/17452934)
Supplement: Supplementary file 1 [file 17452934]

## Supporting Information

# Ultrafast Rechargeable Zinc Battery Based on High Voltage Graphite Cathode and Stable Nonaqueous Electrolyte

*Ning Zhang,<sup>\*,†,§</sup> Yang Dong,<sup>†</sup> Yuanyuan Wang,<sup>†</sup> Yixuan Wang,<sup>†</sup> Jiajun Li,<sup>†</sup> Jianzhong Xu,<sup>\*,†</sup>*

*Yongchang Liu,<sup>\*,‡,§</sup> Lifang Jiao,<sup>§</sup> and Fangyi Cheng<sup>§</sup>*

<sup>†</sup>College of Chemistry & Environmental Science, Key Laboratory of Analytical Science and Technology of Hebei Province, Hebei University, Baoding 071002, China

<sup>‡</sup>Beijing Advanced Innovation Center for Materials Genome Engineering, Institute for Advanced Materials and Technology, University of Science and Technology Beijing, Beijing 100083, China

<sup>§</sup>Key Laboratory of Advanced Energy Materials Chemistry (Ministry of Education), College of Chemistry, Nankai University, Tianjin 300071, China

### Corresponding Authors

<sup>\*</sup>(N.Z.) E-mail: ningzhang@hbu.edu.cn; <sup>\*</sup>(J.Z.X.) E-mail: xujz@hbu.edu.cn;

<sup>\*</sup>(Y.C.L.) E-mail: liuyc@ustb.edu.cn

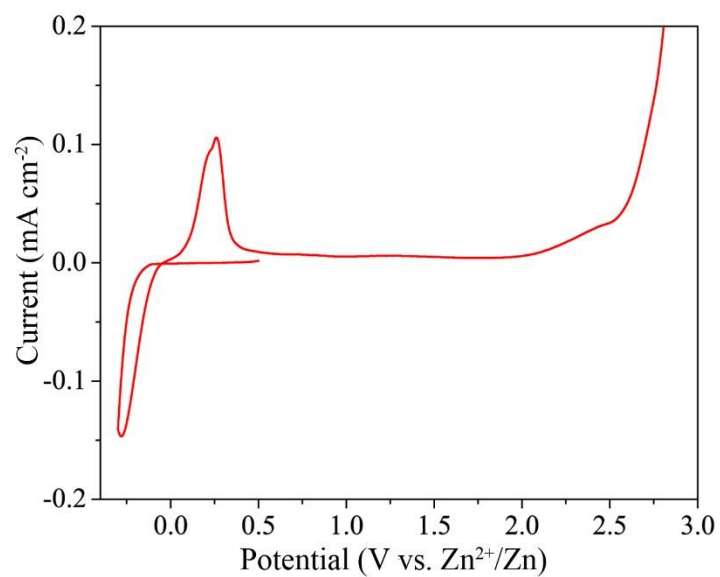

**Figure S1.** Electrochemical window of the 1 M Zn(TFSI)<sub>2</sub> in EC/DEC electrolyte at a scan rate of 1 mV s<sup>-1</sup>.

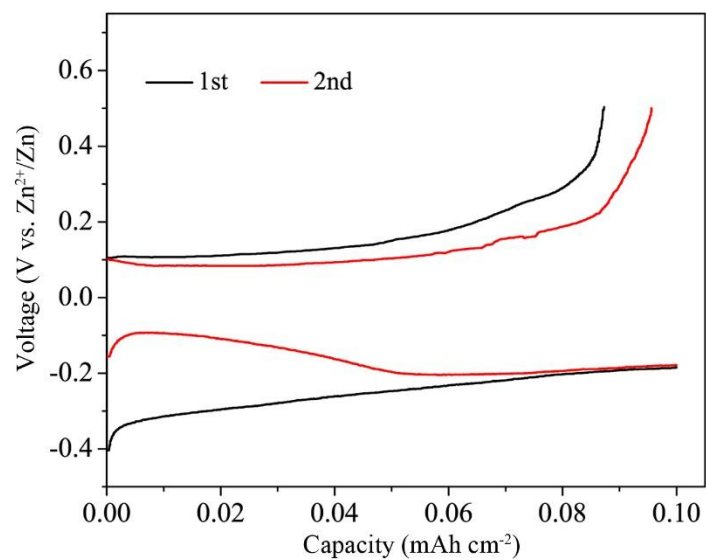

**Figure S2.** The typical Zn plating/stripping profiles at the 1st and 2nd cycles of the Zn/Ti cell at  $0.2 \text{ mA cm}^{-2}$  with a deposition capacity of  $0.1 \text{ mAh cm}^{-2}$ .

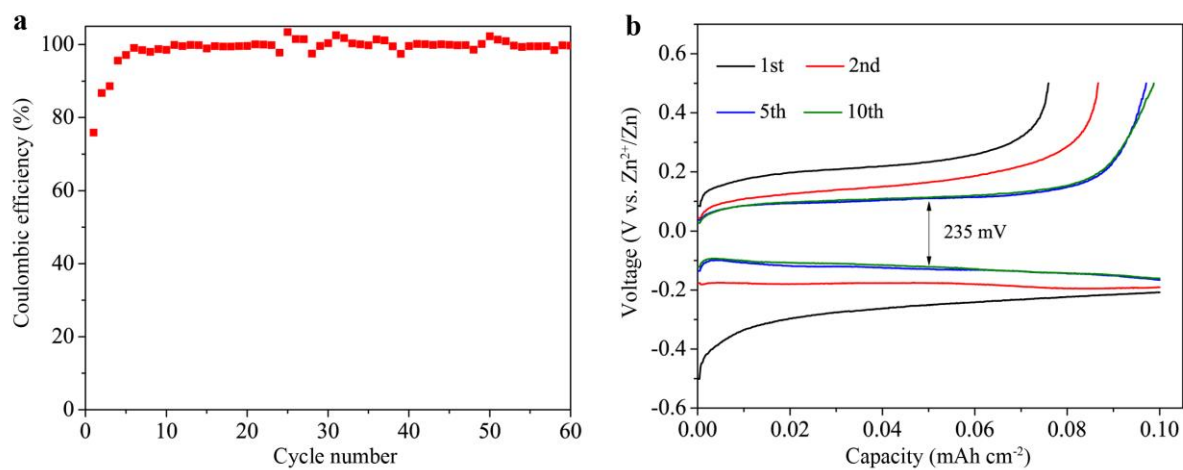

**Figure S3.** (a) Coulombic efficiency and (b) typical Zn plating/stripping profiles of the Zn/Ti cell using the 1 M  $\text{Zn}(\text{TFSI})_2$  in EC/DEC electrolyte at  $0.2 \text{ mA cm}^{-2}$  with a deposition capacity of  $0.1 \text{ mAh cm}^{-2}$ .

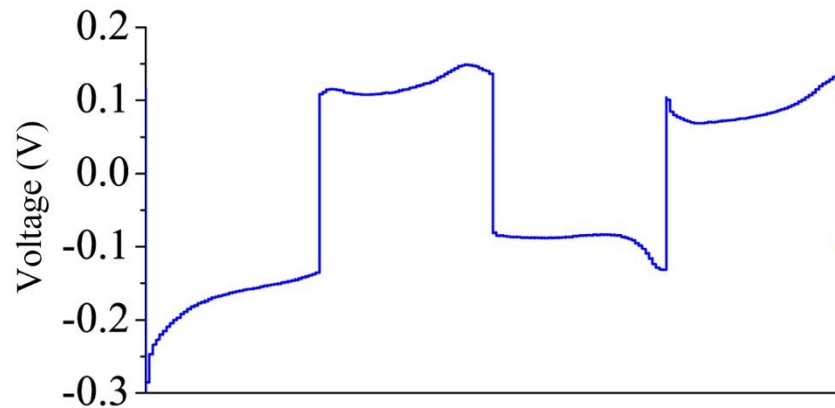

**Figure S4.** The Zn plating/stripping curves at the initial two cycles of the Zn/Zn symmetrical cell at  $0.5 \text{ mA cm}^{-2}$  with a discharge/charge time of 0.5 h.

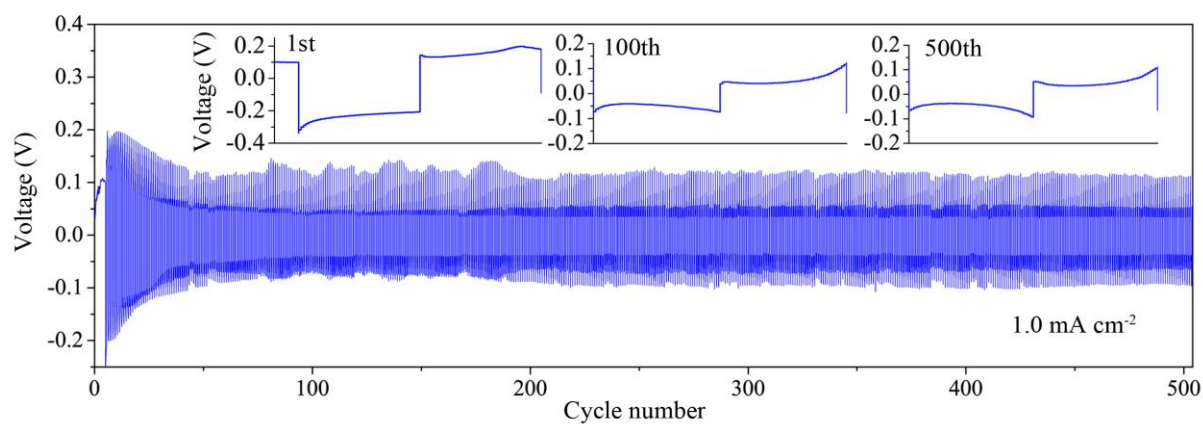

**Figure S5.** Galvanostatic cycling at 1.0 mA cm<sup>-2</sup> (discharge/charge time: 0.5 h) of the Zn/Zn symmetrical cell with the selected Zn plating/stripping curves (insets).

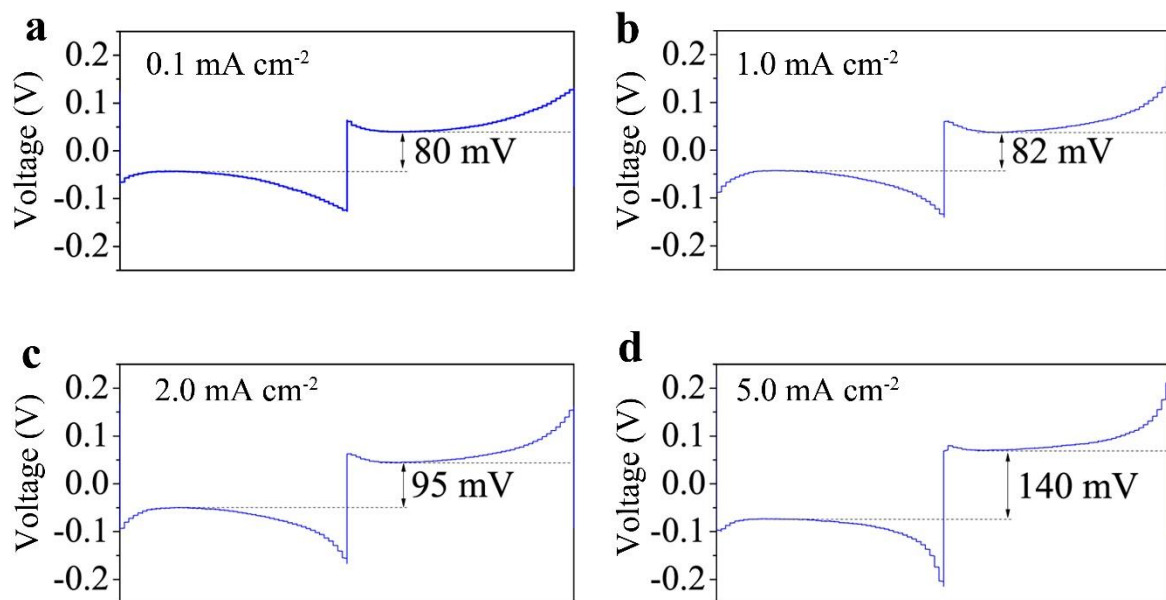

**Figure S6.** Zn plating/stripping curves of the Zn/Zn cell using 1 M Zn(TFSI)<sub>2</sub> in AN electrolyte at (a) 0.1, (b) 1.0, (c) 2.0, (d) 5.0 mA cm<sup>-2</sup>.

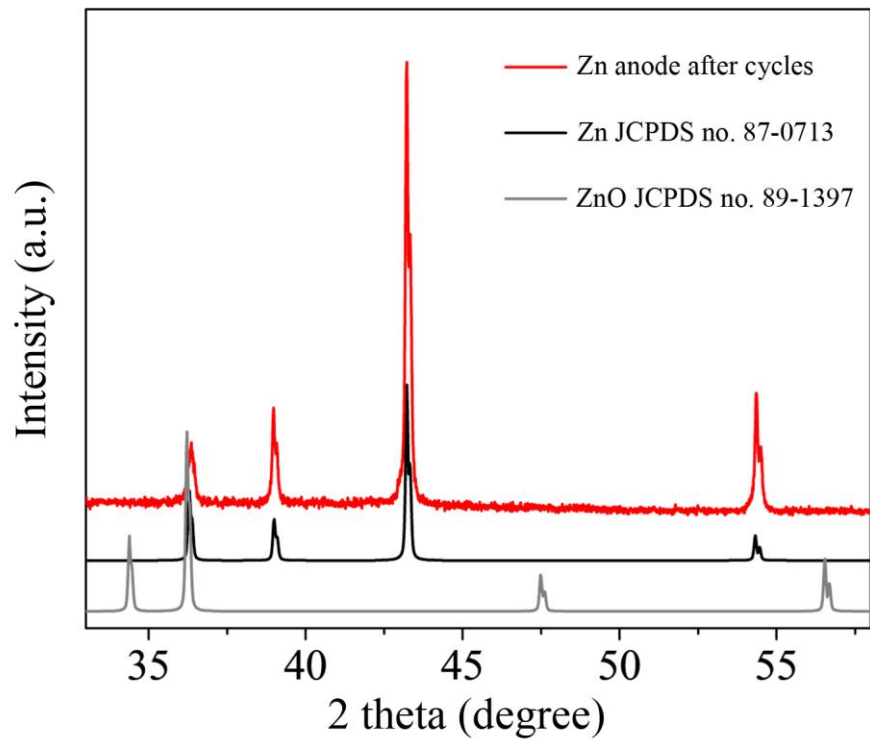

**Figure S7.** XRD pattern of the Zn anode after 200 cycles.



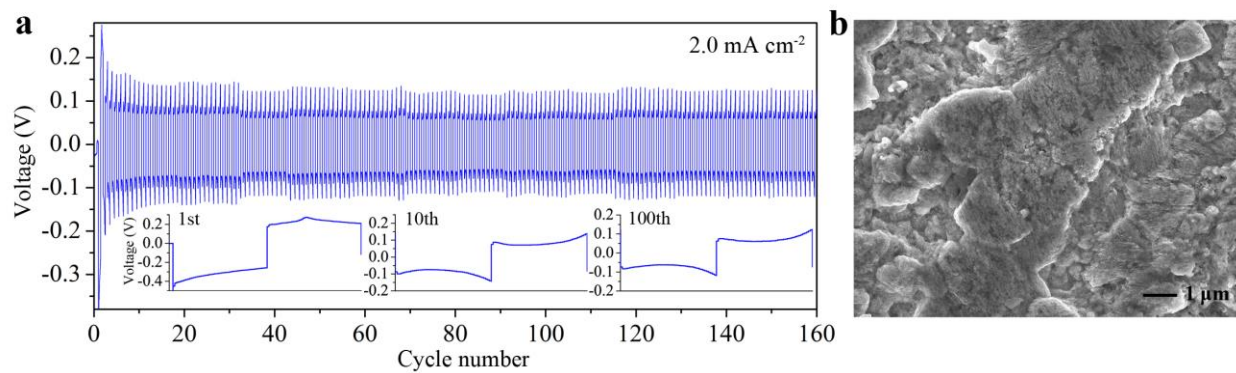

**Figure S8.** (a) Galvanostatic cycling at  $2.0 \text{ mA cm}^{-2}$  of the Zn/Zn symmetrical cell with a discharge/charge time of 0.5 h. Insets show the selected Zn plating/stripping curves. (b) SEM image of the Zn anode after 160 cycles.

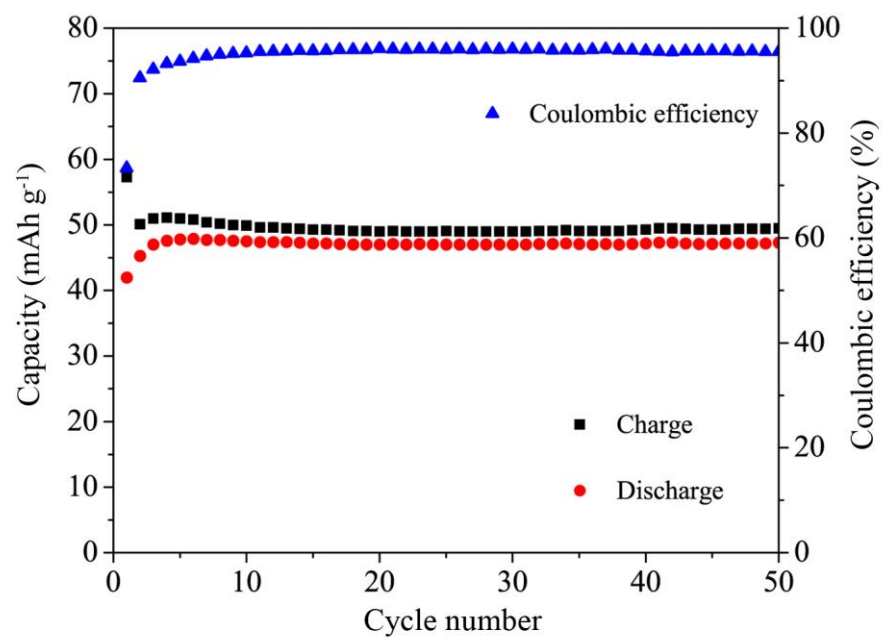

**Figure S9.** Cycling performance of the Zn-graphite battery using the 1 M Zn(TFSI)<sub>2</sub> in AN electrolyte at 50 mA g<sup>-1</sup>.

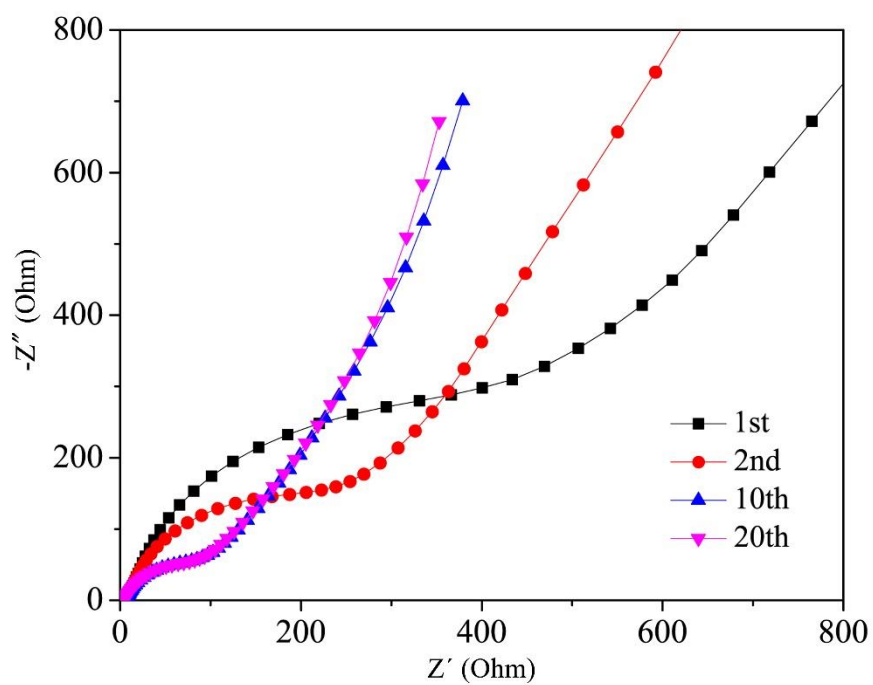

**Figure S10.** EIS spectra of the Zn-graphite battery after the 1st, 2nd, 10th, and 20th cycles.

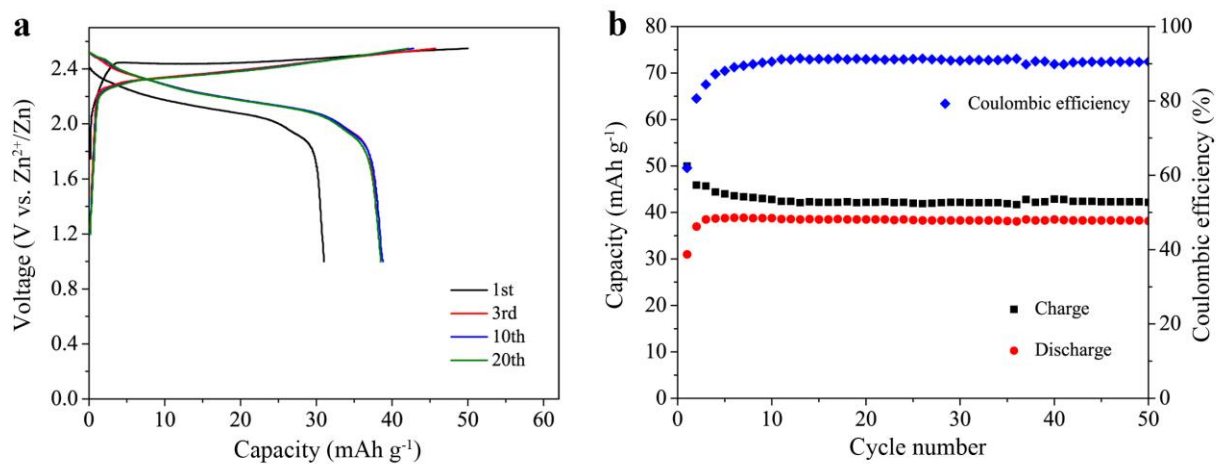

**Figure S11.** (a) Typical charge/discharge curves and (b) cycling performance at  $50 \text{ mA g}^{-1}$  of the Zn-graphite battery using the  $0.5 \text{ M Zn(TFSI)}_2$  in AN electrolyte.

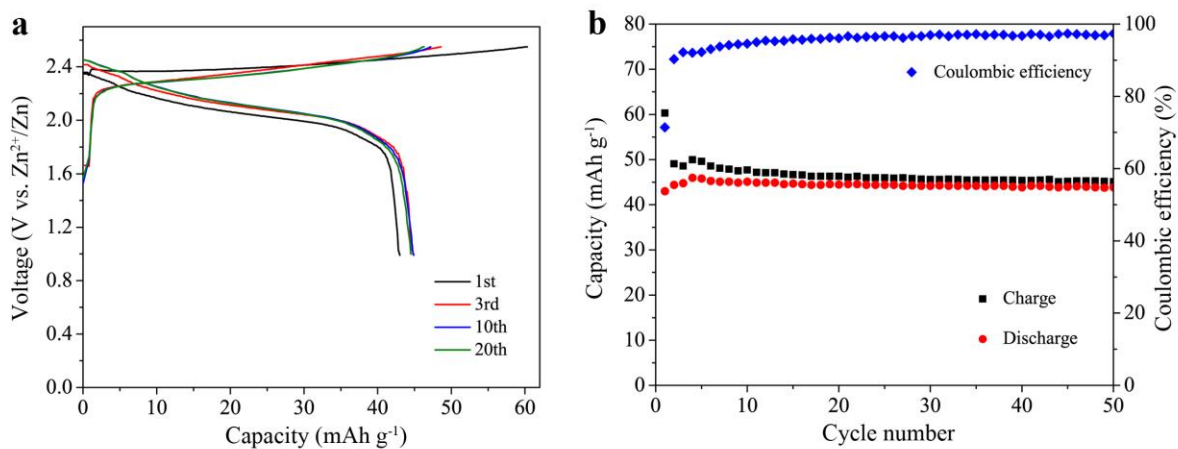

**Figure S12.** (a) Typical charge/discharge curves and (b) cycling performance at  $50 \text{ mA g}^{-1}$  of the Zn-graphite battery using the  $2 \text{ M Zn(TFSI)}_2$  in AN electrolyte.

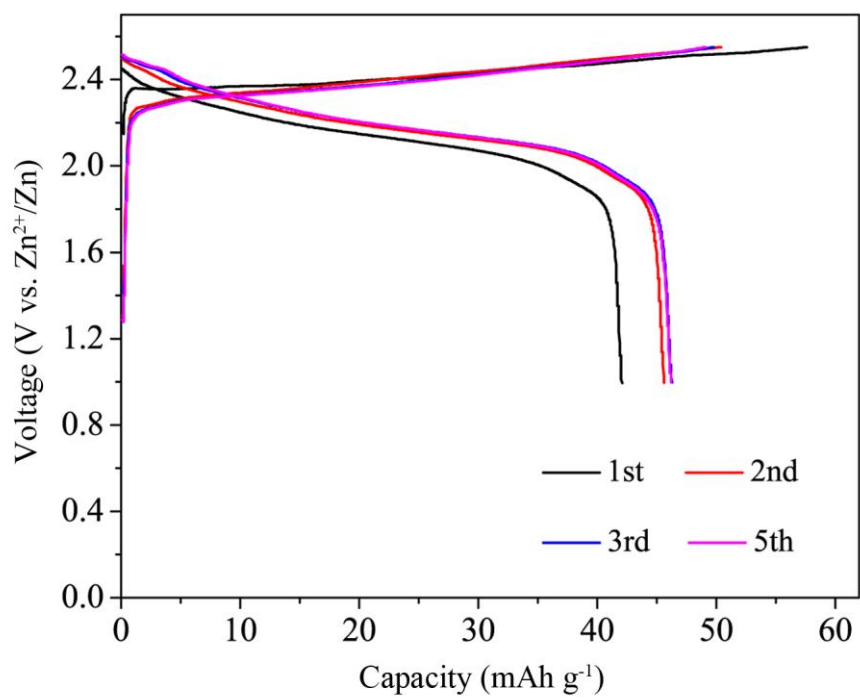

**Figure S13.** Typical charge/discharge curves of the graphite cathode using stainless steel foil as the current collector at 50 mA g<sup>-1</sup>.

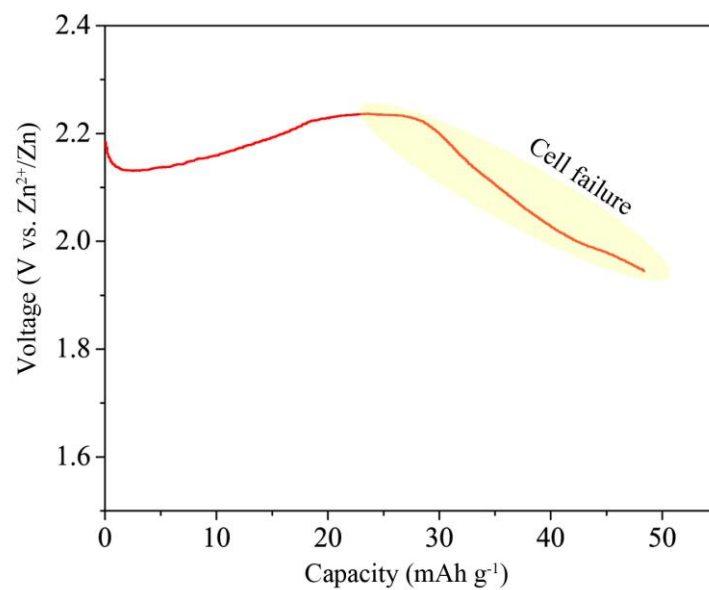

**Figure S14.** Charge curve of the Zn-graphite battery using the 1 M Zn(TFSI)<sub>2</sub> in EC/DEC electrolyte at 50 mA g<sup>-1</sup>.

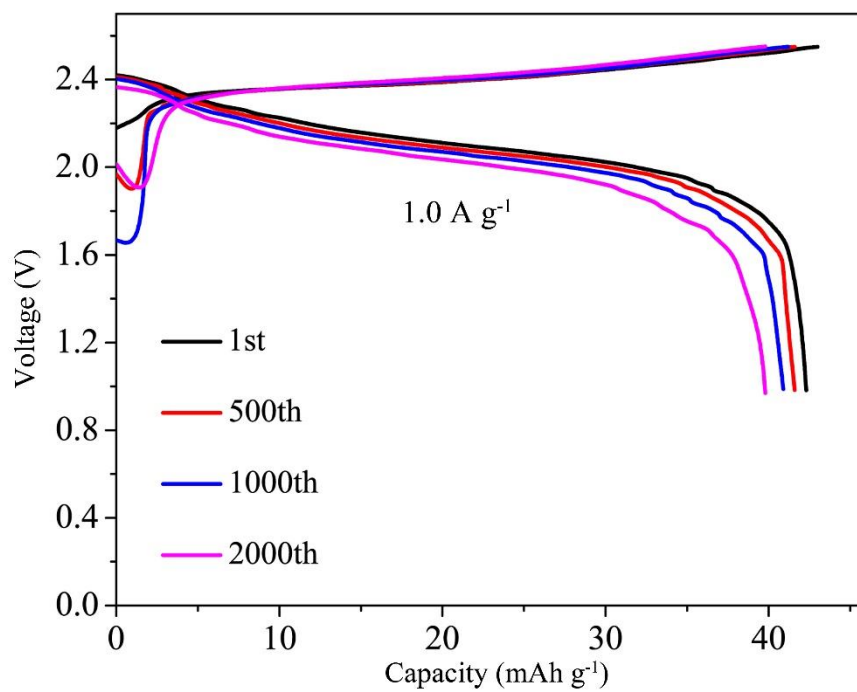

**Figure S15.** Representative charge/discharge profiles of the Zn-graphite battery at 1.0 A g<sup>-1</sup>.



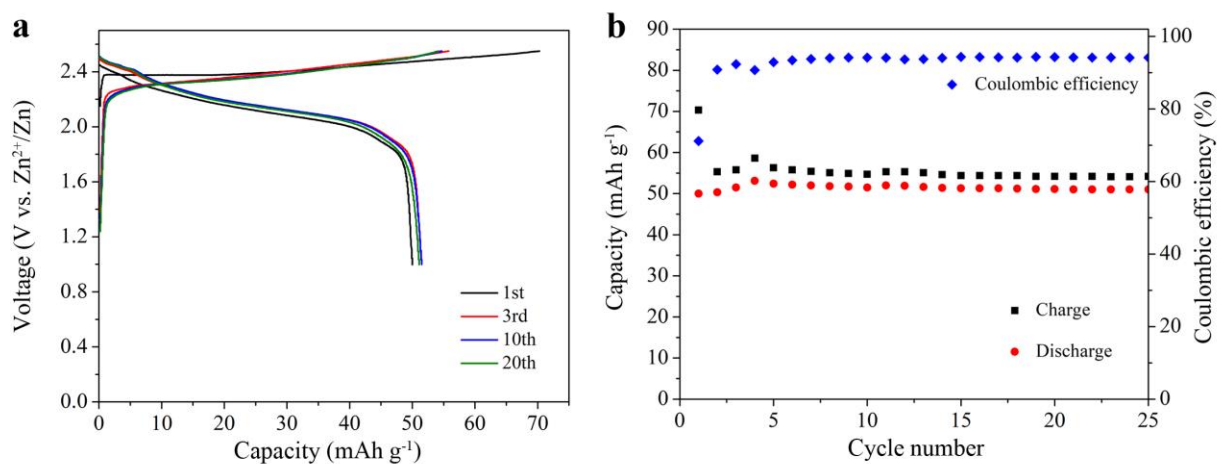

**Figure S16.** (a) Typical charge/discharge curves and (b) cycling performance of the graphite cathode with a lower loading mass of  $\sim 2 \text{ mg cm}^{-2}$  at  $50 \text{ mA g}^{-1}$ .

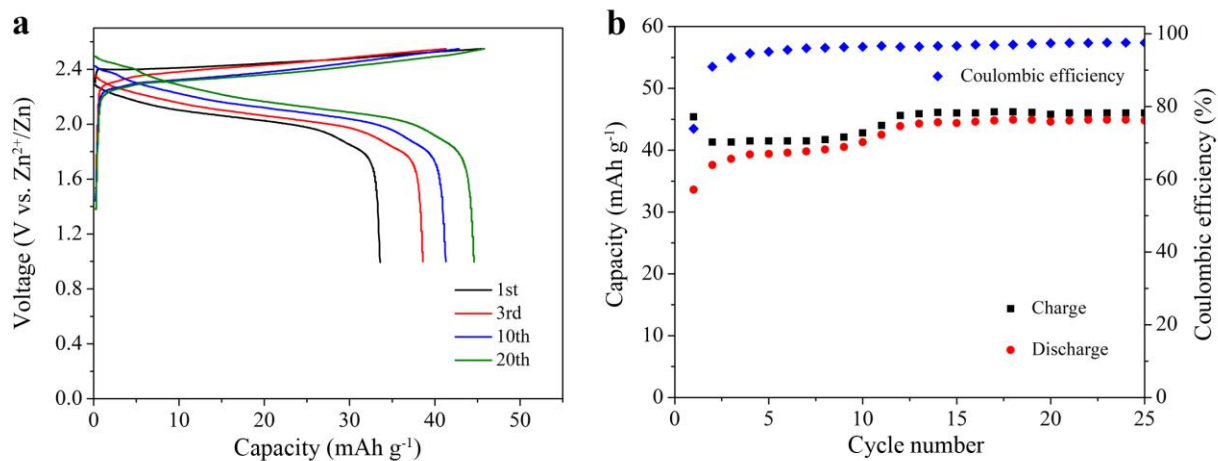

**Figure S17.** (a) Typical charge/discharge curves and (b) cycling performance of the graphite cathode with a higher loading mass of  $\sim 10 \text{ mg cm}^{-2}$  at  $50 \text{ mA g}^{-1}$ .

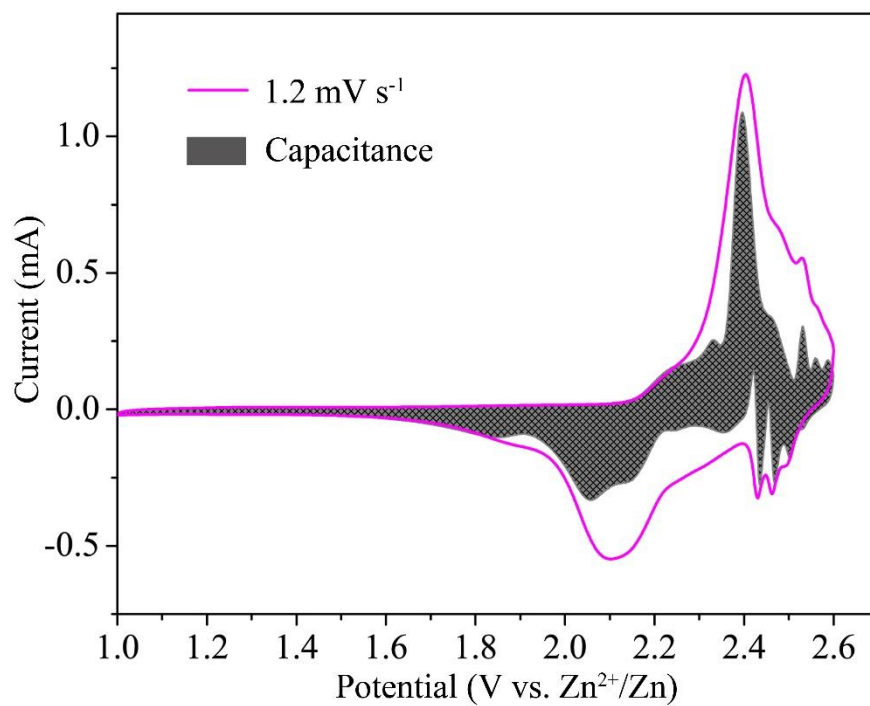

**Figure S18.** CV profile of the graphite cathode displaying the pseudocapacitive contribution (grey region) to the total current at 1.2 mV s<sup>-1</sup>.

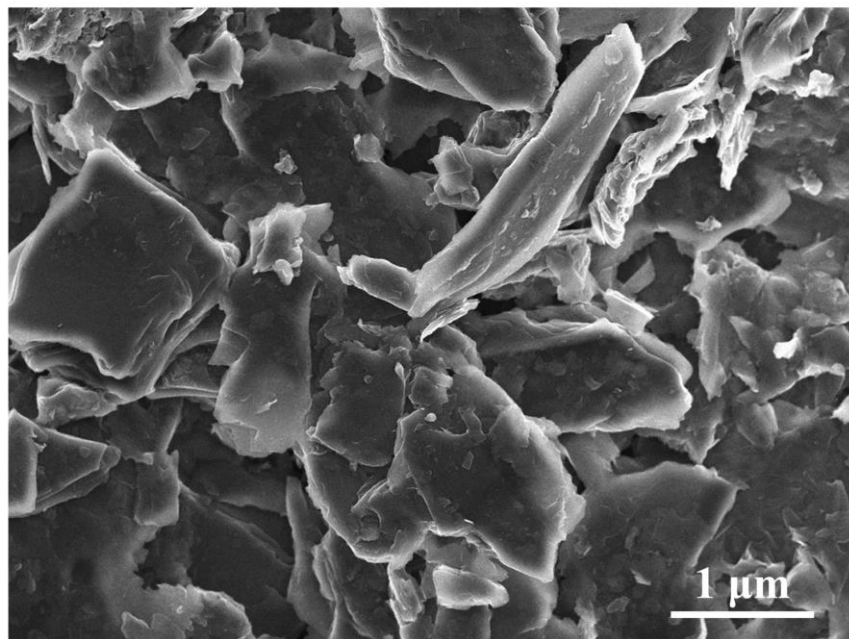

**Figure S19.** SEM image of the pristine graphite electrode.

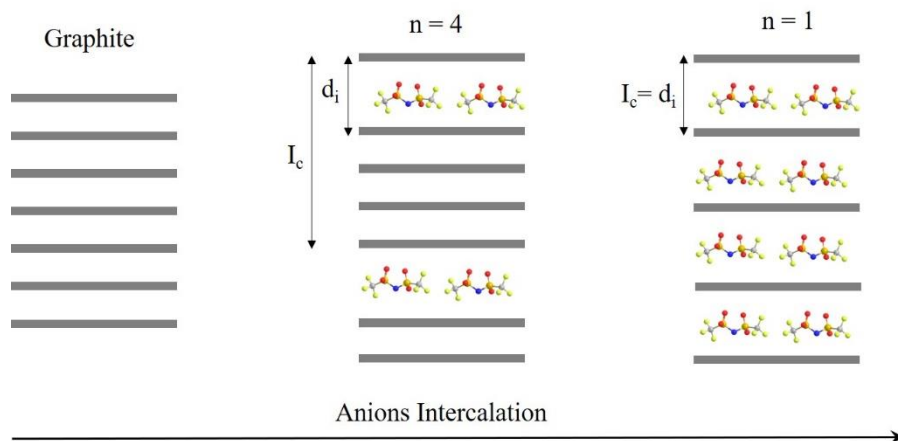

**Figure S20.** Schematic diagram of the selected stages of graphite intercalation compounds (GIC).  $I_c$  is the periodic distance.  $d_i$  is the intercalant gallery height.

According to the Bragg's law,

$$d_{(00n+1)} = \lambda / 2 \sin \theta_{(00n+1)} = I_c / n + 1 \quad (\text{Equation S1});$$

$$d_{(00n+2)} = \lambda / 2 \sin \theta_{(00n+2)} = I_c / n + 2 \quad (\text{Equation S2})$$

By determining the ratio of the  $d_{(00n+1)}/d_{(00n+2)}$  peak position, the most dominant state  $n$  can be assigned as follow:

$$n = 1 / (\sin \theta_{(00n+2)} / \sin \theta_{(00n+1)} - 1) - 1 \quad (\text{Equation S3})$$

After assigning the  $(00n+1)$  indices, the intercalant gallery height ( $d_i$ ) and gallery expansion ( $\Delta d$ ) can be calculated using:

$$I_c = d_i + (n-1) \times 3.35 \text{ \AA} = \Delta d + 3.35 \text{ \AA} \times n = (n+1) \times d_{(00n+1)} \quad (\text{Equation S4})^{[1-3]}$$

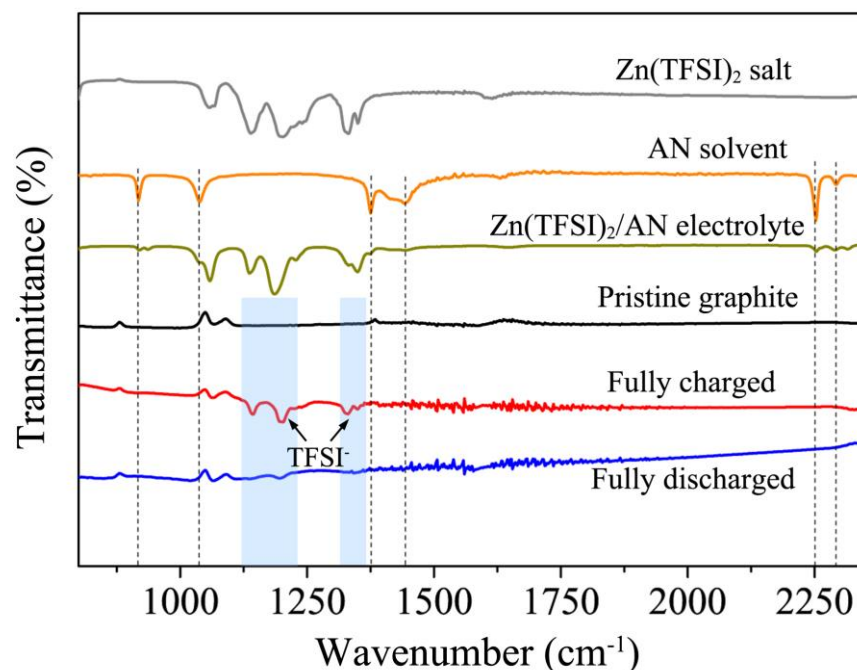

**Figure S21.** FTIR spectra of the  $\text{Zn}(\text{TFSI})_2$  salt, AN solvent,  $\text{Zn}(\text{TFSI})_2/\text{AN}$  electrolyte, pristine graphite cathode, and graphite cathodes at the fully charged and discharged states.

Obviously, the charged graphite shows the intercalated  $\text{TFSI}^-$  signals between  $1125\text{ cm}^{-1}$  and  $1375\text{ cm}^{-1}$ , and no AN vibration peaks can be observed, further attesting that no solvent co-intercalation occurs. Moreover, the two main peaks of  $\text{TFSI}^-$  display blue shift from  $1137\text{ cm}^{-1}$  and  $1187\text{ cm}^{-1}$  in the  $\text{Zn}(\text{TFSI})_2/\text{AN}$  electrolyte to  $1143\text{ cm}^{-1}$  and  $1200\text{ cm}^{-1}$  in the charged cathode, may due to the different absorbance nature of  $\text{TFSI}^-$  in AN solvents and in graphite interlayers. After discharging, the signal of graphite can revert to the pristine state, associated with the anions deintercalation.

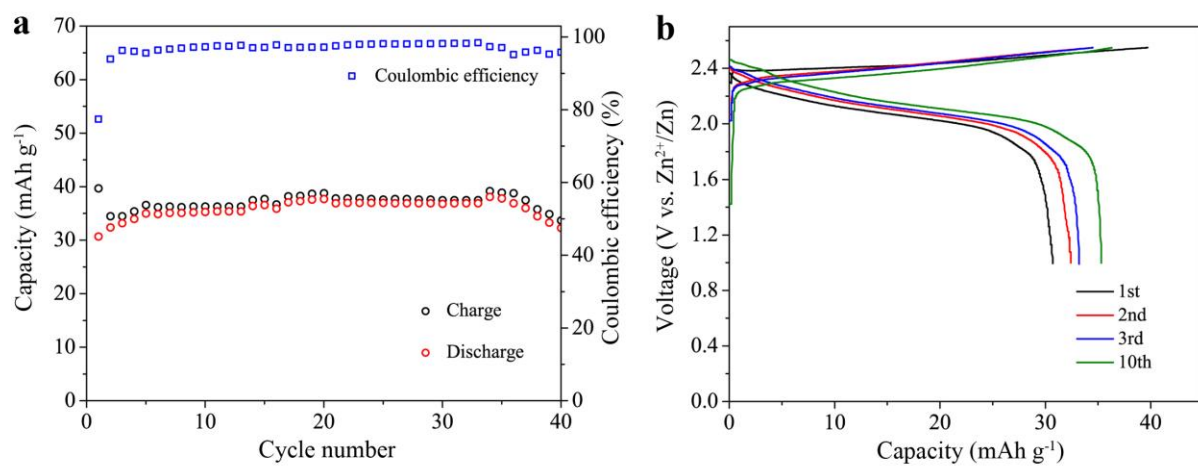

**Figure S22.** (a) Cycling performance and (b) typical charge/discharge curves of the Ti-graphite cell in 1 M Zn(TFSI)<sub>2</sub>/AN electrolyte at 50 mA g<sup>-1</sup>.

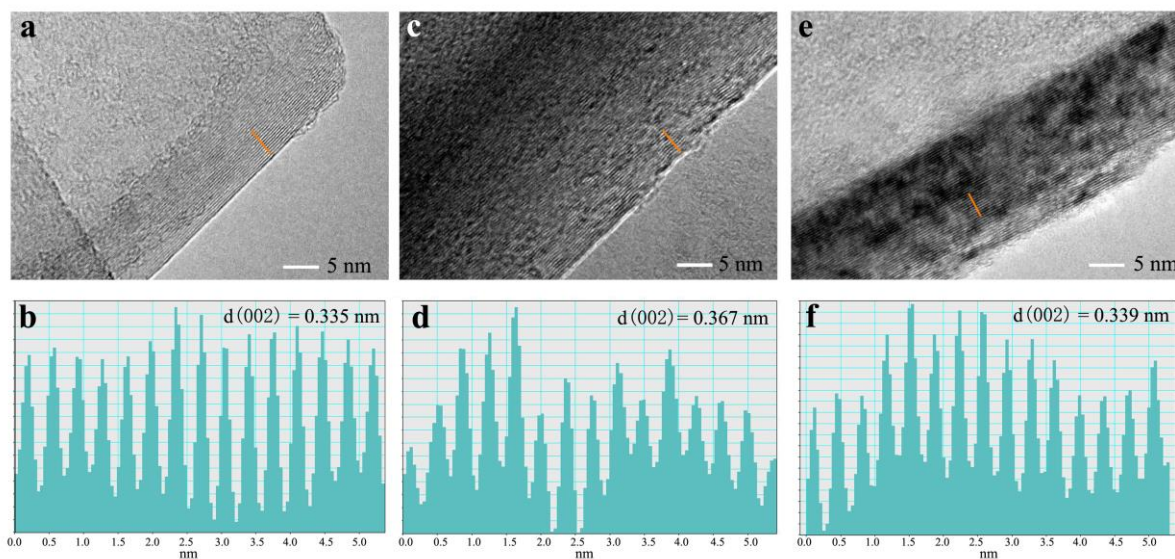

**Figure S23.** (a,c,e) HRTEM images and (b,d,f) the contrast profiles along the orange lines of the (a,b) pristine graphite, and graphite cathodes at the first fully (c,d) charged and (e,f) discharged states.



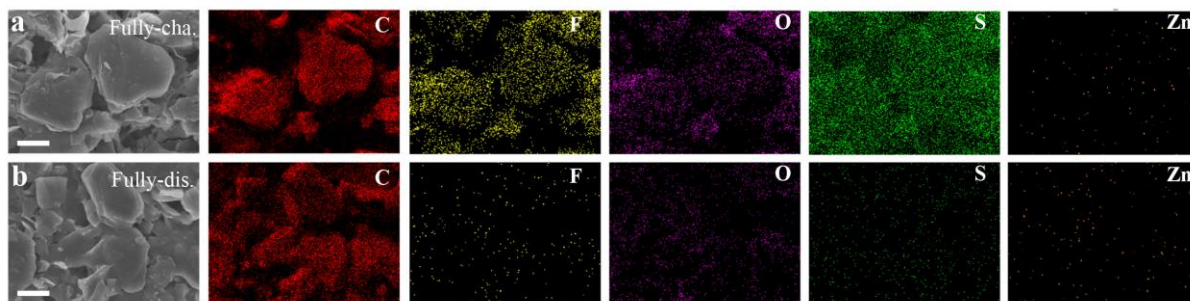

**Figure S24.** SEM images of the first fully (a) charged and (b) discharged graphite cathodes along with the relevant element mapping images.

## Supplementary Note 1

Calculation of the ratio of electrolyte for anion intercalation in the cycle test to the total amount of electrolyte addition.

The 1 M Zn(TFSI)<sub>2</sub>/AN electrolyte added in one coin-type cell is 60  $\mu$ L, corresponding to  $0.12 \times 10^{-3}$  mol TFSI<sup>-</sup> anions. The loading mass of graphite is 4 mg cm<sup>-2</sup> and the area of current collector is 0.785 cm<sup>2</sup> (round slice with a diameter of 1 cm). Thus, the graphite mass is 3.14 mg in one cell. In Figure 2b, the stable specific charge capacity is 50 mAh g<sup>-1</sup> (the 10th cycle) at 0.05 A g<sup>-1</sup>, corresponding to 0.157 mAh total capacity ( $50 \times 3.14 \div 1000 = 0.157$  mAh) that is 0.5652 Coulomb (C) or  $0.5858 \times 10^{-5}$  mol e<sup>-</sup> ( $0.157 \times 3.6 = 0.5652$  C; 1 C =  $1.0365 \times 10^{-5}$  mol e<sup>-</sup>). According to the equation of  $x$  TFSI<sup>-</sup> + Graphite  $\leftrightarrow$  Graphite[TFSI<sup>-</sup>]<sub>x</sub> +  $x$  e<sup>-</sup>, the charge process will consume  $0.5858 \times 10^{-5}$  mol TFSI<sup>-</sup> anions. Therefore, the ratio of electrolyte for anion intercalation in the 10th cycle to the total amount of electrolyte addition can be estimated to ~4.88% ( $0.5858 \times 10^{-5} \div (0.12 \times 10^{-3}) \times 100\% = 4.88\%$ ). Similarly, the charge capacity is 42.7 mAh g<sup>-1</sup> at 1.0 A g<sup>-1</sup> in Figure 2e, and the corresponding ratio can be estimated to ~4.17%.

**Table S1.** Electrochemical performances of the multivalent cations (e.g.,  $\text{Ca}^{2+}$ ,  $\text{Al}^{3+}$ ) based batteries using graphite as cathodes.

| Battery Systems                                                               | Electrolyte                                                                                   | Electrochemical Performance                                                                                                                                                                                                                                                                                                                                                                            | Ref.      |
|-------------------------------------------------------------------------------|-----------------------------------------------------------------------------------------------|--------------------------------------------------------------------------------------------------------------------------------------------------------------------------------------------------------------------------------------------------------------------------------------------------------------------------------------------------------------------------------------------------------|-----------|
| Al-graphite battery using Al foil anode and graphitic foam cathode            | $\text{AlCl}_3$ /1-ethyl-3-methylimidazolium chloride ([EMIm]Cl) ionic liquid electrolyte     | 65 mAh $\text{g}^{-1}$ at 0.066 A $\text{g}^{-1}$ ;<br>~90% CE at 0.1 A $\text{g}^{-1}$ ;<br>~100% capacity retention after 4000 cycles at 4.0 A $\text{g}^{-1}$ with CE values between 90% and 97%.                                                                                                                                                                                                   | 1         |
| Al-graphite dual-ion battery using Al foil anode and graphite cathode         | 4 M $\text{LiPF}_6$ ethyl-methyl carbonate (EMC) electrolyte                                  | 78 mAh $\text{g}^{-1}$ at 0.5 A $\text{g}^{-1}$ ;<br>~75% CE at 0.05 A $\text{g}^{-1}$ ;<br>~75% capacity retention when the current density increased from 0.1 to 0.5 A $\text{g}^{-1}$ ;<br>~88% capacity retention after 200 cycles at 0.2 A $\text{g}^{-1}$ with CE values between 78% and 98%.                                                                                                    | 4         |
| Ca-ion battery using Sn foil anode and graphite cathode                       | 0.8 M $\text{Ca}(\text{PF}_6)_2$ in mixed solvents of EC-PC-DMC-EMC (volume ratio is 2:2:3:3) | 45 mAh $\text{g}^{-1}$ at 0.4 A $\text{g}^{-1}$ ;<br>~80% CE at 0.1 A $\text{g}^{-1}$ ;<br>~55% capacity retention when the current density increased from 0.1 to 0.4 A $\text{g}^{-1}$ ;<br>~95% capacity retention after 350 cycles at 0.1 A $\text{g}^{-1}$ with CE values between 80% and 95%.                                                                                                     | 5         |
| Ca-ion battery using mesocarbon microbead anode and expanded graphite cathode | 0.7 M $\text{Ca}(\text{PF}_6)_2$ in mixed solvents of EC-DMC-EMC (volume ratio is 4:3:2)      | ~83% capacity retention when the current density increased from 1 C to 5 C;<br>62 mAh $\text{g}^{-1}$ at 1 C with 94% capacity retention after 300 cycles with CE values between 60% and 92%.                                                                                                                                                                                                          | 6         |
| Zn-graphite battery using Zn foil anode and commercial graphite cathode.      | 1 M $\text{Zn}(\text{TFSI})_2$ in AN                                                          | 47.5 mAh $\text{g}^{-1}$ at 0.05 A $\text{g}^{-1}$<br>42.3 mAh $\text{g}^{-1}$ at 0.5 A $\text{g}^{-1}$ ;<br>~95% CE at 0.05 A $\text{g}^{-1}$ ;<br>~99% and 84% capacity retentions when the current density increased from 0.1 to 1.0 and to 4.0 A $\text{g}^{-1}$ , respectively;<br>97.3% and 82% capacity retentions after 1000 and 4000 cycles at 1.0 A $\text{g}^{-1}$ with CE values of ~100%. | This work |

## Supplementary References

- [1] Lin, M.-C.; Gong, M.; Lu, B.; Wu, Y.; Wang, D.-Y.; Guan, M.; Angell, M.; Chen, C.; Yang, J.; Hwang, B.-J.; Dai, H. An Ultrafast Rechargeable Aluminium-Ion Battery. *Nature* **2015**, *520*, 324–328.
- [2] Jiang, X.; Liu, X.; Zeng, Z.; Xiao, L.; Ai, X.; Yang, H.; Cao, Y. A Nonflammable Na<sup>+</sup>-Based Dual-Carbon Battery with Low-Cost, High Voltage, and Long Cycle Life. *Adv. Energy Mater.* **2018**, *8*, 1802176.
- [3] Kravchyk, K. V.; Bhauriyal, P.; Piveteau, L.; Guntlin, C. P.; Pathak, B.; Kovalenko, M. V. High-Energy-Density Dual-Ion Battery for Stationary Storage of Electricity Using Concentrated Potassium Fluorosulfonylimide. *Nat. Commun.* **2018**, *9*, 4469.
- [4] Zhang, X.; Tang, Y.; Zhang, F.; Lee, C.-S. A Novel Aluminum-Graphite Dual-Ion Battery. *Adv. Energy Mater.* **2016**, *6*, 1502588.
- [5] Wang, M.; Jiang, C.; Zhang, S.; Song, X.; Tang, Y.; Cheng, H.-M. Reversible Calcium Alloying Enables a Practical Room-Temperature Rechargeable Calcium-Ion Battery with a High Discharge Voltage. *Nat. Chem.* **2018**, *10*, 667–672.
- [6] Wu, S.; Zhang, F.; Tang, Y. A Novel Calcium-Ion Battery Based on Dual-Carbon Configuration with High Working Voltage and Long Cycling Life. *Adv. Sci.* **2018**, *5*, 1701082.
